1 **Persistence of child marriage in rural Bangladesh and impact on maternal and perinatal**  
2 **health: findings from a health and demographic surveillance system**

3

4 Kyu Han Lee<sup>1</sup>, Atique I. Chowdhury<sup>2</sup>, Qazi S. Rahman<sup>2</sup>, Solveig A. Cunningham<sup>3</sup>, Shahana  
5 Parveen<sup>4</sup>, Sanwarul Bari<sup>2</sup>, Shams E. Arifeen<sup>2</sup>, Emily S. Gurley<sup>1</sup>

6

7 <sup>1</sup>Department of Epidemiology, Johns Hopkins Bloomberg School of Public Health, Baltimore,  
8 MD, USA

9 <sup>2</sup>Maternal and Child Health Division, icddr,b, Dhaka, Bangladesh

10 <sup>3</sup>Department of Global Health, Emory University, Atlanta, GA, USA

11 <sup>4</sup>Infectious Diseases Division, icddr,b, Dhaka, Bangladesh

12 **ABSTRACT**

13 **Objectives**

14 To describe temporal trends in child marriage between 1990 and 2019 in a rural sub-district of  
15 Bangladesh and characterize relationships between age, time to pregnancy, complications during  
16 delivery, and perinatal mortality.

17

18 **Design**

19 Health and demographic surveillance system.

20

21 **Setting**

22 Baliakandi sub-district, Bangladesh.

23

24 **Participants**

25 56,155 female residents.

26

27 **Main outcome measures**

28 Annual proportion of marriages to female residents under 18 years of age, time between first  
29 marriage and pregnancy, proportion of births with complications during delivery, and odds of  
30 perinatal mortality.

31

32 **Results**

33 Between 1990 and 2010, the proportion of marriages to female residents under 18 years of age  
34 decreased from 71% to 57%. Most notably, marriages to females aged 10 to 12 years dropped

35 from 22% of all marriages to 3%. In 2019, 53% of all marriages were to females under 18 years.  
36 The estimated time between first marriage and pregnancy did not differ by female age at  
37 marriage. By 365 days after marriage, the cumulative incidence of pregnancy was approximately  
38 50% for each age group. Adolescent girls were more likely to experience complications during  
39 delivery with at least one complication reported for 36% of mothers aged 13 to 15 years, 32% of  
40 mothers aged 16 to 17 years, and 23% of mothers aged 18 to 34 years ( $\chi^2$  test,  $P < 0.001$ ).  
41 Compared to adults, births among females aged 13 to 15 years were more likely to result in  
42 stillbirths (odds ratio 2.23, 95% confidence interval 1.19 to 4.16) and births among females 16-  
43 17 years were more likely to result in early neonatal deaths (odds ratio 1.57, 95% confidence  
44 interval 1.01 to 2.42).

45

## 46 **Conclusions**

47 Child marriage persists in Baliakandi. Over half of all marriages were to child brides and only  
48 minor reductions were seen over the past decade. Pregnancies were common among adolescent  
49 girls with no evidence of delayed pregnancy after marriage. Compared to adults, adolescents  
50 were more likely to experience complications during delivery and perinatal death. Preventing  
51 child marriage has substantial social and health benefits for girls and, by doing so, will also  
52 contribute to Bangladesh's commitment to reduce child mortality.

53

## 54 **INTRODUCTION**

55 In 2019 alone, approximately 5.2 million children under-five died worldwide[1]. While  
56 remarkable reductions in mortality have been observed over the past two decades among older  
57 children, progress has been slow in reducing neonatal deaths, which now account for nearly half

58 of all under-five mortality [1]. Even less progress has been made in preventing stillbirths.  
59 Globally, an estimated 2 million babies are stillborn at 28 weeks or more of gestation each year  
60 [2]. Current trends in under-five mortality and stillbirths suggest we will not achieve our global  
61 targets set for 2030, which includes the Sustainable Development Goal (SDG) target of 25  
62 under-five deaths per 1,000 live births [1] and the Every Newborn Action Plan target of 12  
63 stillbirths per 1,000 total births [2].

64 Girls who become pregnant during adolescence are at increased risk for experiencing a  
65 perinatal death [3] and for obstetric complications including pregnancy-induced hypertension,  
66 obstructed labor, obstetric fistula, and postpartum hemorrhage [4–7]. These complications during  
67 pregnancy and childbirth are the leading cause of death among adolescent girls [8].  
68 These risks are exacerbated by the persistent practice of child marriage [9], a human rights  
69 violation that profoundly impacts one of the most vulnerable populations: adolescent girls. Child  
70 marriage, defined as the formal or informal union of a child under 18 years of age [10],  
71 disproportionately affects girls, particularly in low- and middle-income countries [11], and  
72 contributes to severe social, developmental, and reproductive harms [12]. Although extensive  
73 global efforts have been made to end child marriage, progress has been stagnant in recent years.  
74 In 2018, 21% of women aged 20-24 years worldwide were married before 18 years of age and, at  
75 the current rate, it would take at least 50 years to end child marriage, decades past yet another  
76 SDG target [11].

77 Globally, an estimated 16 million girls aged 15 to 19 become pregnant each year and  
78 90% of these adolescent pregnancies occur within marriage [9]. Given societal and familial  
79 pressures to bear children immediately after marriage in many communities [12], marriage often

80 means the beginning of a sexual relationship for children who are still in the process of maturing  
81 both physically and cognitively [3].

82         Some of the highest rates of child marriage are found in Bangladesh. In 2018, 59% of  
83 women aged 20 to 24 years were married before 18 years of age and 28% of married adolescents  
84 aged 15 to 19 reported a pregnancy [13]. In 2017, the Child Health and Mortality Prevention  
85 Surveillance (CHAMPS) network established a health and demographic surveillance system  
86 (HDSS) in Baliakandi, a rural sub-district of Bangladesh with approximately 216,000 residents  
87 [14]. We used the Baliakandi HDSS to characterize temporal trends in child marriage in this  
88 rural region of Bangladesh. We examined whether pregnancy was delayed for newly married  
89 adolescents and examined the relationship between maternal age, complications during delivery,  
90 and perinatal mortality.

91

## 92 **METHODS**

### 93 **Health and demographic surveillance system**

94 We used data from an ongoing HDSS established in Baliakandi, Bangladesh. Baseline surveys  
95 were conducted between March and August 2017 during which household and  
96 sociodemographic data were collected from all residents. Married females under 50 years of age  
97 completed a birth history questionnaire either during baseline surveys or after in-migration.

98         Four to six data rounds were conducted every year between September 2017 and  
99 February 2020, during which we identified key demographic events including marriages,  
100 pregnancies, pregnancy outcomes, deaths, and out-migrations. As missed demographic events  
101 can be identified in subsequent data rounds, we used HDSS data as of February 2020 for events  
102 that occurred between September 2017 and August 2019 for most analyses. Each year, we

103 observed consent rates at or greater than 99% among approximately 52,000 households. Given  
104 regular follow up, missing data were uncommon for variables included in this analysis.  
105 Individuals with missing data were excluded from relevant analysis and the total missing was  
106 noted in the results. Additional details on the Baliakandi HDSS are described by Cunningham et  
107 al [14].

108 We defined stillbirth as fetal demise at or after 28 weeks of estimated gestational age and  
109 early neonatal death as death within the first 7 days after live birth. Stillbirths and early neonatal  
110 deaths were considered perinatal deaths.

111

#### 112 **Age at marriage among female residents**

113 We estimated the annual proportion of marriages to children among female residents married  
114 between 1990 and 2019 using data from birth history questionnaires and marriage events  
115 identified data rounds between September 2017 and December 2019 (Supplementary figure 1).  
116 The age difference between partners was calculated among first marriages that occurred in  
117 Baliakandi between September 2017 and December 2019.

118

#### 119 **Time between first marriage and childbearing**

120 We estimated time between first marriage and pregnancy among female residents under 35 years  
121 of age who remained in Baliakandi for at least 180 days after marriage (Supplementary figure 1).  
122 Females who in-migrated after marriage were excluded from the analysis as marriage dates were  
123 limited only to the month and year and dates were collected retrospectively, which could  
124 introduce systematic bias through misreporting [15]. The last menstrual period was used as a  
125 proxy of pregnancy date. We used Kaplan-Meier estimates to examine the relationship between

126 the age at first marriage and time between marriage and pregnancy. Age was categorized as 12-  
127 15 years, 16-17 years, and 18-34 years. To explore potential bias introduced by out-migration,  
128 we compared the age of female residents who exited Baliakandi within 180 days of first marriage  
129 and those who remained for at least 180 days after first marriage. We further restricted survival  
130 analysis to female residents who remained in Baliakandi for at least 365 days after marriage.

131

### 132 **Maternal age at birth and perinatal death**

133 We used logistic regression to estimate the association between maternal age at birth and  
134 perinatal death among all singleton births that occurred between September 2017 and August  
135 2019. We used multinomial logistic regression to estimate the association between maternal age  
136 at birth and stillbirths and early neonatal deaths (Supplementary figure 2). Age was categorized  
137 as 13-15 years, 16-17 years, and 18-34 years. We repeated the model after adjusting for parity  
138 and household wealth. Household wealth was categorized as a quintile based on the  
139 Demographic and Health Survey (DHS) wealth index score [16].

140

### 141 **Complications during delivery**

142 In December 2018, we supplemented the Baliakandi HDSS with detailed pregnancy surveillance  
143 (Supplementary figure 2). All pregnant women identified during data rounds were contacted  
144 within 3 days of giving birth to collect information on complications during delivery. We  
145 estimated the frequency of complications during delivery by maternal age at birth for all  
146 pregnancy outcomes between January and August 2019. For live births, we estimated the  
147 frequency of preterm births, defined as birth before an estimated gestational age of 37 weeks.

148 Gestational age was estimated using the last menstrual period. Chi-squared test and Fisher's  
149 exact test were used to test for statistical differences by maternal age.

150

## 151 **RESULTS**

### 152 **Age at marriages among female residents**

153 A total 56,155 female residents of Baliakandi were married between 1990 and 2019 and all had  
154 age at marriage. Among female residents married in 1990, 71% were married before 18 years of  
155 age (915/1,284). This proportion dropped to 57% among female residents married in 2010  
156 (1,185/2,063). Between 1990 and 2010, the proportion of marriages to females under 13 years  
157 decreased from 22% (288/1,284) to 3% (72/2,063), females aged 13 to 15 years decreased from  
158 32% (411/1,284) to 26% (538/2,063) and females aged 16 to 17 years increased from 17%  
159 (216/1,284) to 28% (575/2,063) (Figure 1). The mean age at marriage increased from 15.3 years  
160 (standard deviation (SD) 3.2) to 17.3 years (SD 3.4).

161 Between 2010 and 2019, the overall proportion of marriages to female residents under 18  
162 years dropped from 57% (1,185/2,063) to 53% (1,698/3,210). The proportion to females under  
163 13 years decreased from 3% (72/2,063) to 1% (28/3,210), females aged 13 to 15 years decreased  
164 from 26% (538/2,063) to 21% (671/3,210), females aged 16 to 17 years increased from 28%  
165 (575/2,063) to 31% (999/3,210). The mean age at marriage increased from 17.3 years (SD 3.4) to  
166 18.2 years (SD 4.2).

167

168 **Figure 1. Age at marriage among 56,155 female residents of Baliakandi sub-district,**  
169 **Bangladesh, 1990 to 2019. Bars represent the annual proportion of marriages to specific**



170 age groups. Points and error bars represent the mean age at marriage and standard  
171 deviation.

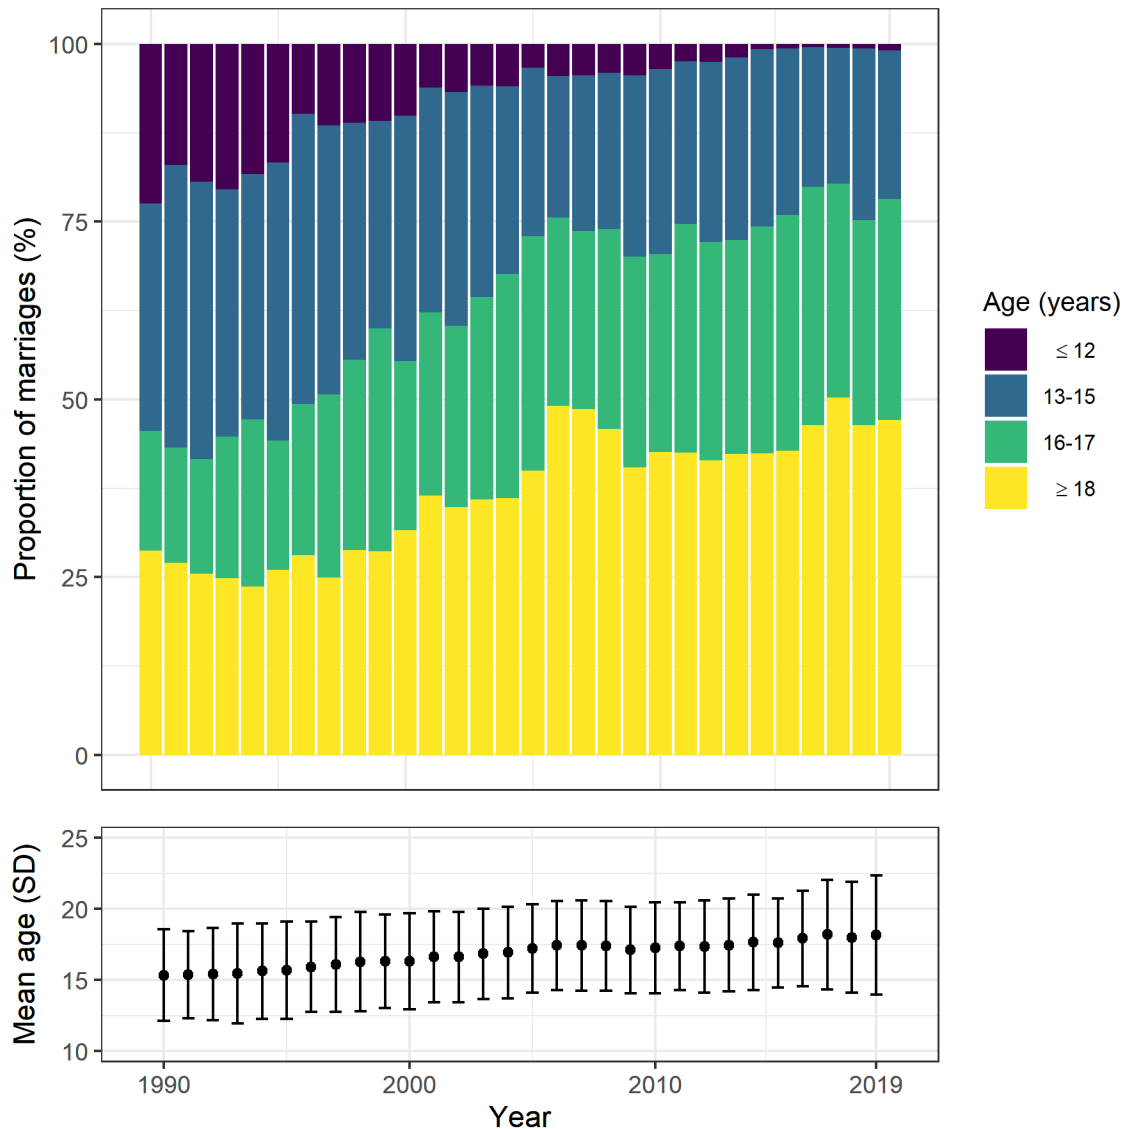

172

173

174 A total 3,860 first marriages were identified in Baliakandi between September 2017 and

175 August 2019. Among all first marriages, males were a median of 8 years (interquartile range

176 (IQR) 5 to 10) older than their female spouses. The median age difference was 9.5 years (IQR 8

177 to 12) for females married before 13 years of age, 9 years (IQR 6 to 12) for those married at

178 ages 13 to 15 years, 8 years (IQR 6 to 10) for those married at ages 16 to 17 years, and 6 years  
179 (IQR 3 to 9) among those married at ages 18 to 34 years. We excluded one female resident with  
180 missing spouse age.

181

## 182 **First marriages and out-migration**

183 A total 3,764 female residents under 35 years of age reported first marriages in Baliakandi  
184 between September 2017 and August 2019 (Supplementary table 1). Younger brides were more  
185 likely to be in the lowest household wealth quintile: 25% among ages 10 to 15 years (271/1,077),  
186 20% among ages 16-17 years (227/1,150), and 15% among females ages 18 to 34 years  
187 (236/1,537) ( $\chi^2$  test,  $P < 0.001$ ). We excluded one resident with missing household wealth data.

188 Out-migration was common among newly married females with 51% (1,940/3,764)  
189 exiting Baliakandi within the first 180 days of marriage (Supplementary table 1). This proportion  
190 included females with less than 180 days of follow up by end of August 2019. Most out-  
191 migrations occurred immediately after marriage with 45% of newly married women  
192 (1,694/3,764) out-migrated within a week of marriage. Out-migrants were less likely to be child  
193 brides (1,090/1,940, 56%) compared to those who stayed in Baliakandi (1137/1,824, 62%;  $\chi^2$   
194 test,  $P < 0.001$ ).

195

## 196 **Time between first marriage and pregnancy**

197 As pregnancies could not be captured among out-migrants, we estimated time between first  
198 marriage and pregnancy for 1,320 female residents who were newly married in Baliakandi  
199 between September 2017 and August 2019 and remained in Baliakandi for at least 180 days after  
200 marriage. Fifty-four percent (715/1,320) reported at least one pregnancy by August 2019. This

201 proportion includes females with less than 180 days of follow up after marriage. The mean time  
202 to pregnancy or end of follow up was 264 days. Thirty-three percent (239/715) of first  
203 pregnancies were among females married at ages 12 to 15 years, 29% (209/715) were among  
204 those married at ages 16 to 17 years and 37% (267/715) were among those married at ages 18 to  
205 34 years.

206 Time between marriage and pregnancy was estimated using the last menstrual period. We  
207 estimated Kaplan-Meier cumulative incidence curves stratified by age at marriage and did not  
208 find a statistically significant difference by age in the timing of pregnancy (log-rank test,  
209  $P=0.535$ ) (Figure 2). Within 365 days of marriage, approximately half of all newly married  
210 females had a pregnancy: 52% (95% confidence interval (CI) 47 to 57%) among those married at  
211 12 to 15 years, 53% (95% CI 48 to 59%) among those married at ages 16 to 17 years and 50%  
212 (95% CI 45 to 54%) among those married at ages 18 to 34 years. Results were similar after  
213 restricting the analysis to female residents who remained in Baliakandi for at least 365 days after  
214 marriage (supplementary table 1).

215

216 **Figure 2. Cumulative incidence of pregnancies after first marriage and 95% confidence**  
217 **intervals, by age at marriage. Among 1,320 females under 35 years of age who remained in**  
218 **Baliakandi for at least 180 days after marriage, Baliakandi sub-district, Bangladesh. Grey**  
219 **dashed line indicates 365 days after marriage.**

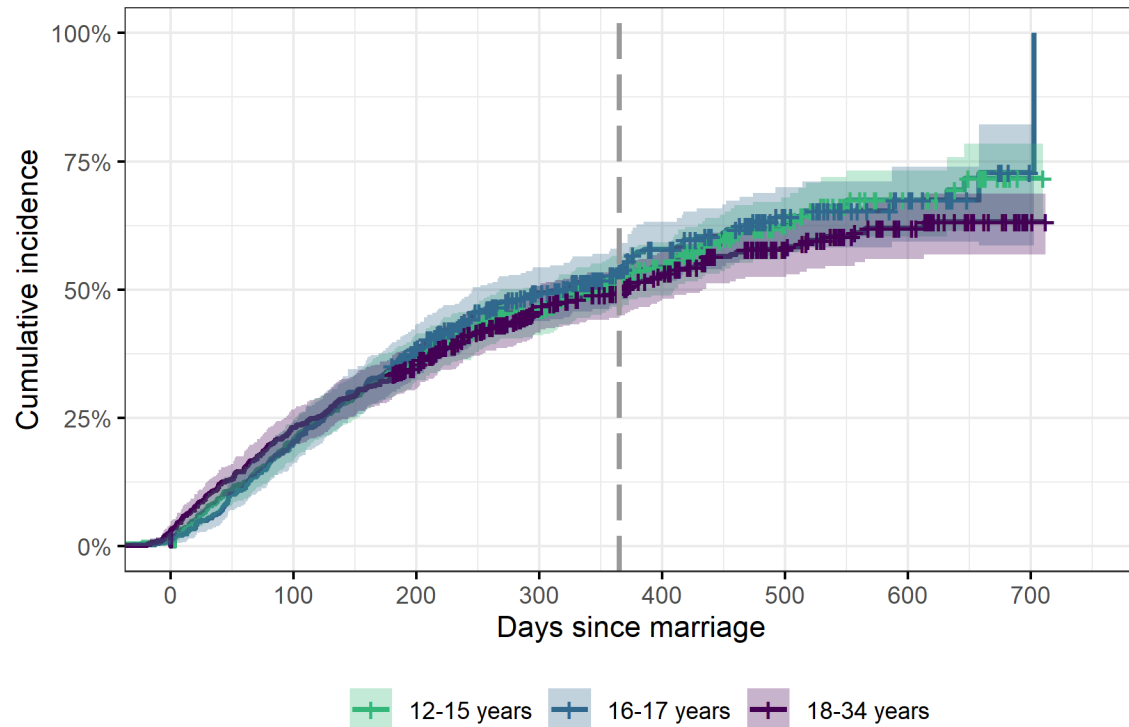

220

221

## 222 **Pregnancy outcomes and perinatal deaths**

223 We identified a total 10,345 pregnancy outcomes in Baliakandi between September 2017 and  
224 August 2019: 269 (3%) among females aged 12 to 15 years, 863 (8%) among females aged 16 to  
225 17 years and 9,213 (89%) among females aged 18 years or older. Pregnancy outcomes included  
226 1,018 (10%) miscarriages/abortions, 217 (2%) singleton stillbirths, and 9,024 (87%) singleton  
227 live births. Outcomes of multiple gestations included 75 (1%) twin live births, 10 (0%) twin  
228 births with at least 1 stillbirth, and 1 (0%) triplet live birth.

229 We identified a total 446 perinatal deaths. Two hundred thirty (52%) were stillbirths, 96  
230 (22%) were neonatal deaths that occurred within 24 hours after birth, and 120 (27%) were early  
231 neonatal deaths that occurred after 24 hours (Figure 3). Nineteen (4%) perinatal deaths were  
232 among females aged 13 to 15 years, 48 (11%) were among females aged 16 to 17 years, 282  
233 (63%) were among females aged 18 to 29 years, and 97 (22%) were among females aged 30

234 years and above. There were no perinatal deaths among females under 13 years of age. This  
235 resulted in perinatal mortality rates of 79 perinatal deaths per 1,000 total births among females  
236 aged 13 to 15 years, 62 perinatal deaths per 1,000 total births among females aged 16 to 17, 42  
237 perinatal deaths per 1,000 total births among females aged 18 to 29 years, and 58 perinatal deaths  
238 per 1,000 total births among females aged 30 years and above.  
239

240 **Figure 3. Proportion of stillbirths and early neonatal deaths among 446 perinatal deaths,**  
241 **September 2017 to August 2019, Baliakandi sub-district, Bangladesh. Each square**  
242 **represents one percent of the total.**

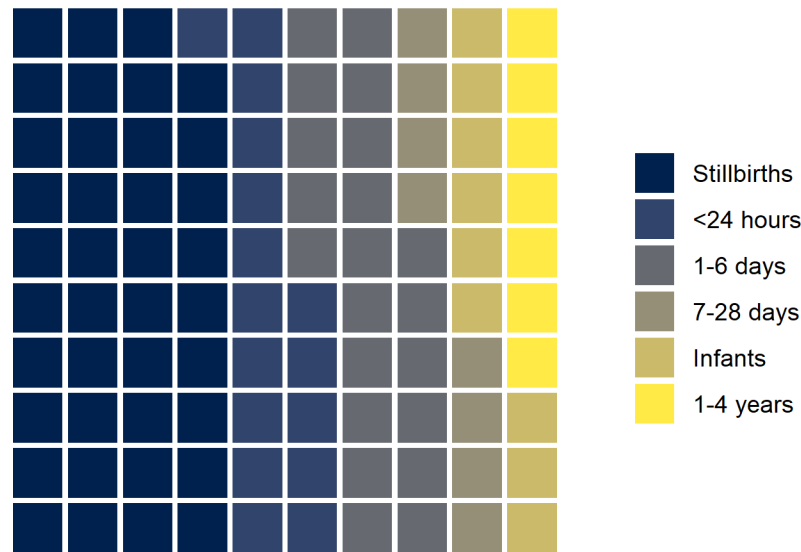

243  
244 **Maternal age at birth and perinatal mortality among singleton births**  
245 To examine the relationship between maternal age at birth and perinatal mortality, we restricted  
246 our analysis to singleton births among female residents under 35 years of age (Table 1). Among  
247 singleton births identified between September 2017 and August 2019, 2% (198/8,806) were

248 stillbirths and 2% (188/8,806) ended in early neonatal deaths. The estimated stillbirth rate was 22  
 249 stillbirths per 1,000 singleton births and the estimated early neonatal mortality rate was 22 deaths  
 250 per 1,000 singleton live births. Eighty-four percent of perinatal deaths were among females  
 251 under 30 years of age (324/386) and 52% were among first-time mothers (202/386). Fifty-one  
 252 percent were among first-time mothers under 30 years of age (198/386).

253

254 **Table 1. Characteristics of singleton births among females under 35 years of age,**  
 255 **Baliakandi sub-district, Bangladesh, September 2017 to August 2019.**

| Characteristic                    | All births<br>N=8,806<br>n (%) | Live births<br>surviving 7 days<br>N=8,420<br>n (%) | Stillbirths<br>N=198<br>n (%)             | Early neonatal deaths<br>N=188<br>n (%)     |
|-----------------------------------|--------------------------------|-----------------------------------------------------|-------------------------------------------|---------------------------------------------|
| Maternal age at delivery (years)* |                                |                                                     |                                           |                                             |
| 12 to 15                          | 238 (3%)                       | 221 (3%)                                            | 11 (6%)<br>Rate: 46 per 1,000<br>births   | 6 (3%)<br>Rate: 26 per 1,000 live<br>births |
| 16 to 17                          | 769 (9%)                       | 725 (9%)                                            | 20 (10%)<br>Rate: 26 per 1,000<br>births  | 24 (13%)<br>32 per 1,000 live births        |
| 18 to 34                          | 7,799 (89%)                    | 7,474 (89%)                                         | 167 (84%)<br>Rate: 21 per 1,000<br>births | 158 (84%)<br>21 per 1,000 live births       |

|                           |             |             |           |          |
|---------------------------|-------------|-------------|-----------|----------|
| Parity                    |             |             |           |          |
| Nulliparous               | 3,827 (43%) | 3,625 (43%) | 103 (52%) | 99 (53%) |
| 1                         | 3,252 (37%) | 3,146 (37%) | 57 (29%)  | 49 (26%) |
| 2                         | 1,315 (15%) | 1,261 (15%) | 26 (13%)  | 28 (15%) |
| 3+                        | 412 (5%)    | 388 (5%)    | 12 (6%)   | 12 (6%)  |
| Household wealth quintile |             |             |           |          |
| Highest                   | 1,815 (21%) | 1,751 (21%) | 28 (14%)  | 36 (20%) |
| High                      | 1,863 (21%) | 1,786 (21%) | 45 (23%)  | 32 (22%) |
| Middle                    | 1,809 (21%) | 1,727 (21%) | 42 (21%)  | 40 (21%) |
| Low                       | 1,689 (19%) | 1,610 (19%) | 37 (19%)  | 42 (17%) |
| Lowest                    | 1,630 (19%) | 1,546 (18%) | 46 (23%)  | 38 (19%) |

256 \*No singleton births were reported among mothers under 12 years of age. Births among women over 34 years were  
 257 excluded.

258

259           Compared to females aged 18 to 34 years, the odds of perinatal death were higher for  
260 females aged 13 to 15 years (odds ratio (OR) 1.77, 95% CI 1.07 to 2.93) and females aged 16 to  
261 17 years (OR 1.40, 95% CI 1.01 to 1.93) (Figure 4). When we considered stillbirths and early  
262 neonatal deaths as separate outcomes, females aged 13 to 15 years had higher odds of stillbirth  
263 (OR 2.23, 95% CI 1.19 to 4.16) and females aged 16 to 17 years had higher odds of early  
264 neonatal death (OR 1:57, 95% CI 1.01 to 2.42), compared to females aged 18 to 34 years (Figure  
265 4). Associations were no longer statistically significant for stillbirths (adjusted odds ratio (aOR)  
266 1.77, 95% CI 0.92 to 3.38) and early neonatal deaths (aOR 1.28, 95% CI 0.80 to 2.04), after  
267 adjusting for household wealth and parity (Supplementary table 2).

268

269 **Figure 4. Odds ratios of perinatal death, stillbirth, and early neonatal death compared to**  
270 **births among female residents aged 18 to 34 years. Total 8,806 singleton births among**  
271 **females under 35 years at delivery, Baliakandi sub-district, Bangladesh, September 2017 to**  
272 **August 2019.**



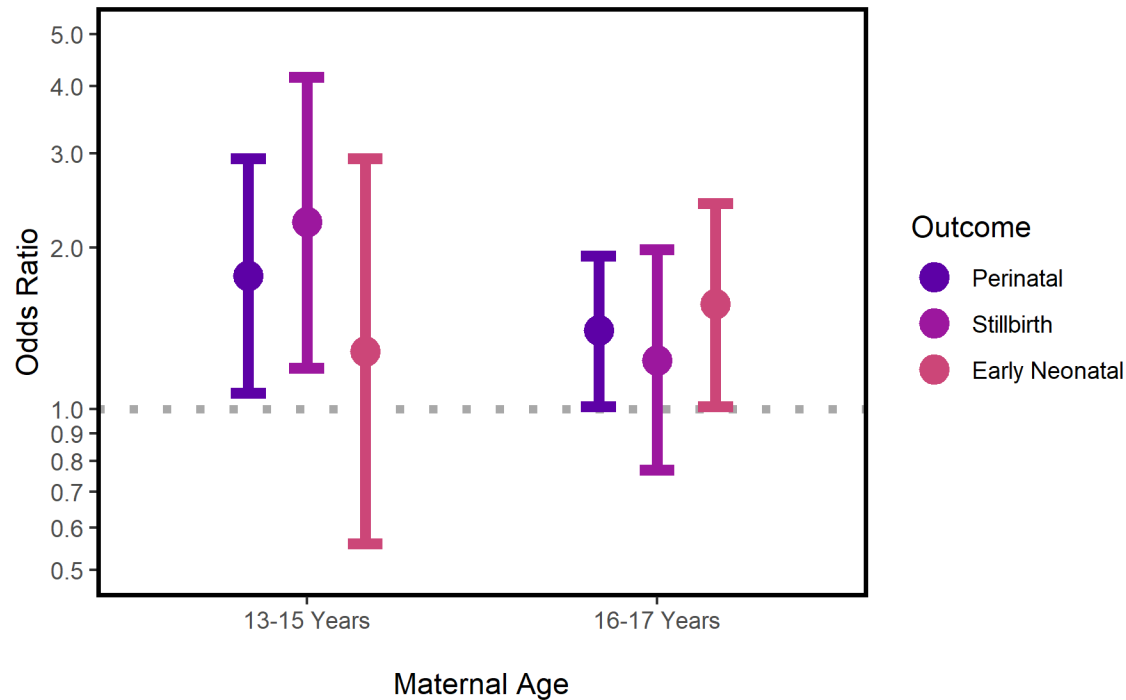

273

274

### 275 **Complications during delivery**

276 Information on complications during delivery were collected through detailed pregnancy  
277 surveillance for 3,286 singleton births of a total 3,311 singleton births (99%) that occurred  
278 between January and August 2019 among female residents who were under 35 years of age at  
279 birth. Complications were common in Baliakandi regardless of maternal age, with 24% of all  
280 births (803/3,286) reporting at least one complication, including prolonged/obstructed labor,  
281 birth trauma or difficult delivery, and heavy bleeding during delivery (Table 2). Nineteen percent  
282 (610/3,286) involved unplanned hospital admissions. Nineteen percent all live births (604/3,223)  
283 were considered preterm based on estimated gestational age and 38% (180/604) of preterm births  
284 involved pre-labor cesarean sections.

285

286 **Table 2. Complications during delivery among 3,286 singleton births by female residents**  
 287 **under 35 years of age, by maternal age at birth, Baliakandi sub-district, Bangladesh,**  
 288 **January to August 2019.**

| Events                                    | All<br>N=3,286<br>n (%) | 13 to 15*<br>years<br>N=101<br>n (%) | 16 to 17<br>years<br>N=291<br>n (%) | 18 to 34<br>years<br>N=2,894<br>n (%) | P-value <sup>†</sup> |
|-------------------------------------------|-------------------------|--------------------------------------|-------------------------------------|---------------------------------------|----------------------|
| Any complications <sup>‡</sup>            | 803 (24%)               | 36 (36%)                             | 93 (32%)                            | 674 (23%)                             | <0.001               |
| Prolonged/obstructed labor                | 267 (8%)                | 14 (14%)                             | 33 (11%)                            | 220 (8%)                              | 0.008                |
| Birth trauma or difficult delivery        | 276 (8%)                | 17 (17%)                             | 42 (14%)                            | 217 (8%)                              | <0.001               |
| High blood pressure                       | 145 (5%)                | 4 (4%)                               | 15 (5%)                             | 126 (5%)                              | 0.728                |
| Heavy bleeding during delivery            | 120 (4%)                | 9 (9%)                               | 10 (3%)                             | 101 (4%)                              | 0.029                |
| Severe headaches with blurred visions     | 114 (3%)                | 5 (5%)                               | 11 (4%)                             | 98 (3%)                               | 0.550                |
| Fetal malpresentation                     | 39 (1%)                 | 2 (2%)                               | 2 (1%)                              | 35 (1%)                               | 0.456                |
| High fever with abdominal pain            | 29 (1%)                 | 1 (1%)                               | 1 (0%)                              | 27 (1%)                               | 0.548                |
| High fever with smelly discharge          | 19 (1%)                 | 1 (1%)                               | 0 (0%)                              | 18 (1%)                               | 0.297                |
| Unplanned hospital admission for delivery | 610 (19%)               | 28 (28%)                             | 79 (27%)                            | 503 (17%)                             | <0.001               |
| Preterm birth <sup>*</sup>                | 604/3,223<br>(19%)      | 14/98<br>(14%)                       | 51/287<br>(18%)                     | 539/2838<br>(19%)                     | 0.456                |

289 \*No singleton birth among children under 13 years of age with data on complications during delivery.

290 <sup>†</sup>Chi-squared test or Fisher’s exact test; comparing all three age groups

291 <sup>‡</sup>Includes any of the listed complications

292 'Only among live births

293

294 Compared to females aged 18 to 34 years, adolescents were more likely to experience at  
295 least one complication during delivery ( $\chi^2$  test,  $P<0.001$ ) and have unplanned admissions ( $\chi^2$  test,  
296  $P<0.001$ ). Among specific complications, obstructed or prolonged labor, birth trauma or difficult  
297 delivery, and heavy bleeding during delivery were more common among females under 18 years  
298 of age, compared to those aged 18 to 34 years ( $\chi^2$  test or Fisher's exact tests, all  $P<0.050$ ).

299

## 300 **DISCUSSION**

301 Using data from a HDSS covering approximately 216,000 residents in a rural sub-district of  
302 Bangladesh, we found almost no change in the proportion of marriages to child brides over the  
303 past decade. In 2019, more than half of all marriages were still to child brides. However, we note  
304 substantial increases in the age of child brides. We found no evidence of postponed pregnancies  
305 for child brides. Half of all newly married females became pregnant within a year of marriage,  
306 including adolescents.

307 Complications during delivery were common in Baliakandi regardless of maternal age.  
308 However, they were more likely to occur in adolescent pregnancies. Over a quarter of deliveries  
309 among adolescent girls involved an unplanned hospital admission and around a third reported  
310 complications, including those related to physical immaturity [3]. Common complications  
311 included prolonged or obstructed labor, birth trauma or difficult deliveries, and heavy bleeding,  
312 which can lead to severe, long-term urologic, gynecologic and neurologic injuries as well as  
313 secondary infertility [17–19].

314 Adolescent pregnancies were more likely to end in perinatal death than pregnancies  
315 among adult women. Risk of perinatal death could partially be explained by parity and

316 household wealth. Adolescent mothers were more likely to be nulliparous, which is associated  
317 with increased risk of obstetric complications and perinatal death in Bangladesh [20,21]. Further,  
318 less wealthy families were more likely to have child brides as well as perinatal deaths, perhaps  
319 due to poor nutrition, lack of resources, and less access of health care [22–25].

320

### 321 **Strengths and weaknesses of this study**

322 A notable strength of this study was the use of HDSS data to investigate child marriage. Most  
323 quantitative studies of child marriage in South Asia are based on Demographic and Health  
324 Surveys [26,27] or other cross-sectional surveys [28]. Unlike cross-sectional samples, the  
325 Baliakandi HDSS prospectively collected key information such as dates of birth, marriage,  
326 pregnancies, and births through frequent data rounds, leading to more accurate reporting and  
327 estimates. In Matlab, Bangladesh, which hosts a similar HDSS originally established in 1966  
328 [15], almost two-thirds of female residents aged 15 to 29 years misreported their age at first  
329 marriage in cross-sectional surveys, with the average reported age nearly 2 years younger than  
330 true values in the HDSS [29]. While the exact causes of underreporting were unknown, it may  
331 have been driven by a desire to reduce dowry costs, which increase with the bride’s age, and to  
332 meet the “preferred age” of brides, which is typically under 20 years [29,30]. If similar  
333 underreporting is true for Baliakandi, we may have underestimated child marriage in years prior  
334 to 2017 given marriages dates were collected retrospectively for this period. Our estimates did  
335 not include female residents who out-migrated nor those who died during this period. While it is  
336 unclear how these deaths might impact our estimates, out-migration may have led to  
337 underestimates. Our findings from 2017 to 2019 suggest newly married brides who out-migrate  
338 were more likely to be child brides than those we remained in Baliakandi. Lastly, our estimates

339 of time between first marriage and pregnancy may have been influenced by downward bias as  
340 adult brides were more likely to out-migrate soon after marriage.

341

### 342 **Comparison with other studies**

343 Our findings from Baliakandi were consistent with larger national trends described in the  
344 Bangladesh DHS [13]; child marriage remains a pervasive and persistent human rights violation  
345 in Bangladesh and little progress has been made in recent years. Over half of all marriages still  
346 involve child brides [13]. Associations between adolescent pregnancies and perinatal death were  
347 consistent with earlier studies which used the Bangladesh DHS. These cross-sectional studies  
348 showed adolescent pregnancies were associated with increased risk of stillbirths and neonatal  
349 mortality [21,31]. Associations between maternal age and obstetric complications were  
350 consistent with a prior study conducted in northwest Bangladesh [20].

351 The preterm birth rate in Baliakandi was consistent with national estimates, which is one  
352 of the highest in the world [32]. One potential explanation was the common practice of elective  
353 cesarean sections in Baliakandi, which may be driven by increased practice without medical  
354 indication, especially among private facilities, by a fear of vaginal deliveries, and the belief that  
355 cesarean deliveries are safer for the mother and baby [33,34].

356

### 357 **Policy implications and conclusions**

358 Bangladesh has one of highest rates of child marriage in the world [13], even with legislation  
359 prohibiting child marriage in existence since 1929 [35]. Critics argue progress may be further  
360 hindered by recent legal exceptions introduced in the 2017 Child Marriage Restraint Act, which

361 permits child marriage under ambiguous circumstances that are “in the best interests of the  
362 minor” [36].

363 Globally, 90% of adolescent pregnancies occur within marriage [9]. Although  
364 childbearing should be delayed among adolescent girls to protect the health of the mother and  
365 newborn [3,12,37], our study showed no evidence of postponed pregnancy among child brides in  
366 Baliakandi. Adolescent pregnancies are likely driven by the social value placed on childbearing  
367 for newly married wives in Bangladesh and the prospect of improving one’s status within the  
368 husband’s family through childbirth [38,39]. Many newly married adolescents lack power and  
369 social status to negotiate delays in pregnancy, coupled with a lack of knowledge or  
370 misconceptions of contraceptives. One example of misconceptions is that contraceptives can lead  
371 to infertility [39]. In contrast, wives who delay childbearing often experience stigma of perceived  
372 infertility, abuse by in-laws, and rumors of infidelity [38]. These dynamics may drive low  
373 contraceptive use and unmet family planning needs seen among adolescent pregnancies [13].  
374 Adolescent pregnancies are more likely to experience obstetric complications such as prolonged  
375 and obstructed labor, which can cause long-term physical consequences [17–19] as well as  
376 devastating psychosocial disabilities even after treatment, as girls deal with shame, stigma, and  
377 rejection by their families and communities [17].

378 The problem of child marriage is daunting; it is a practice deeply rooted in social and  
379 gender norms and sustained by gender inequality, poverty and insecurity [12,40–42]. However,  
380 encouraging commitments have been made to end child marriage in Bangladesh, such as the  
381 UNFPA-UNICEF Global Programme to End Child Marriage, which involves targeted actions in  
382 12 focus countries with high burdens of child marriage, including Bangladesh [43]. Recent  
383 evaluations of the Global Programme show all global targets have been met or surpassed in the

384 first phase (2016 to 2019). Targets include developing life skills and comprehensive sexuality  
385 education among adolescent girls, supporting continued formal or non-formal education among  
386 adolescent girls, increasing awareness of the benefits of preventing child marriage in  
387 communities, supporting health and protection systems, developing national plans of action, and  
388 generating data to accelerate ending child marriage [44]. Further, findings from large randomized  
389 control trials such as BALIKA in Bangladesh suggest various interventions such as education  
390 support, gender rights awareness training, and livelihood training can lead to large reductions in  
391 child marriage. Villages assigned to one of the three aforementioned interventions showed a 25  
392 to 30% reduction in risk of child marriage compared to control villages [45].

393       Only by accelerating ongoing commitments and promoting additional widespread  
394 interventions we can truly eliminate child marriage within the next decade. By addressing child  
395 marriage, we improve the health of two groups of children: adolescent mothers and their  
396 newborns. We can prevent a chain of harmful social, developmental, and reproductive harms that  
397 have lasting impacts on adolescent girls while mitigating the global burden of stillbirths and  
398 neonatal deaths.

399

400 **Financial support:** This work was supported by the Bill & Melinda Gates Foundation (award  
401 number OPP1126780). The funder of the study had no role in the study design, data collection,  
402 data analysis, data interpretation, the writing of the report, and in the decision to submit the  
403 article for publication.

404

405 **Competing interests:** All authors declare no competing interests.

406

407 **Ethical approval:** The study was approved by the icddr,b human subjects review committee.  
408 Written consent was obtained from study participants.

409

## 410 **References**

- 411 1 UN IGME. Levels and Trends in Child Mortality: Report 2020, Estimates developed by the  
412 United Nations Inter-agency Group for Child Mortality Estimation. New York: : UNICEF  
413 2020. <https://data.unicef.org/resources/levels-and-trends-in-child-mortality/>
- 414 2 UN IGME. A Neglected Tragedy: The global burden of stillbirths. New York: : UNICEF  
415 2020. <https://data.unicef.org/resources/a-neglected-tragedy-stillbirth-estimates-report/>
- 416 3 Dixon-Mueller R. How Young Is ‘Too Young’? Comparative Perspectives on Adolescent  
417 Sexual, Marital, and Reproductive Transitions. *Stud Fam Plann* 2008;**39**:247–62.
- 418 4 Ganchimeg T, Ota E, Morisaki N, *et al.* Pregnancy and childbirth outcomes among  
419 adolescent mothers: a World Health Organization multicountry study. *BJOG Int J Obstet*  
420 *Gynaecol* 2014;**121**:40–8. doi:<https://doi.org/10.1111/1471-0528.12630>
- 421 5 Conde-Agudelo A, Belizán JM, Lammers C. Maternal-perinatal morbidity and mortality  
422 associated with adolescent pregnancy in Latin America: Cross-sectional study. *Am J Obstet*  
423 *Gynecol* 2005;**192**:342–9. doi:10.1016/j.ajog.2004.10.593
- 424 6 Melah GS, Massa AA, Yahaya UR, *et al.* Risk factors for obstetric fistulae in north-eastern  
425 Nigeria. *J Obstet Gynaecol J Inst Obstet Gynaecol* 2007;**27**:819–23.  
426 doi:10.1080/01443610701709825



- 427 7 UNFPA. State of World Population 2013: Motherhood in Childhood: Facing the challenge of  
428 adolescent pregnancy. New York: : UNFPA 2013. [https://www.unfpa.org/publications/state-  
429 world-population-2013](https://www.unfpa.org/publications/state-<br/>429 world-population-2013)
- 430 8 UNFPA, WHO, UNICEF, *et al.* Trends in maternal mortality 2000 to 2017: estimates by  
431 WHO, UNICEF, UNFPA, World Bank Group and the United Nations Population Division.  
432 <https://www.unfpa.org/featured-publication/trends-maternal-mortality-2000-2017>
- 433 9 UNFPA. Girlhood, Not Motherhood: Preventing Adolescent Pregnancy. New York: :  
434 UNFPA 2015. <https://www.unfpa.org/publications/girlhood-not-motherhood>
- 435 10 UNICEF. Child marriage. <https://www.unicef.org/protection/child-marriage> (accessed 6 Apr  
436 2021).
- 437 11 UNFPA, UNICEF. Global Programme to Accelerate Action to End Child Marriage Annual  
438 Report 2018. UNFPA and UNICEF 2019. [https://www.unfpa.org/sites/default/files/resource-  
439 pdf/UNFPA-1.PDF](https://www.unfpa.org/sites/default/files/resource-<br/>439 pdf/UNFPA-1.PDF) (accessed 12 Jan 2021).
- 440 12 UNICEF Innocenti Research Centre. Early Marriage: Child Spouses. Florence, Italy: :  
441 UNICEF 2001. [https://www.unicef-irc.org/publications/291-early-marriage-child-  
442 spouses.html](https://www.unicef-irc.org/publications/291-early-marriage-child-<br/>442 spouses.html)
- 443 13 NIPORT, ICF. Bangladesh Demographic and Health Survey 2017–18: Key Indicators.  
444 Dhaka, Bangladesh and Rockville, Maryland, USA: : NIPORT and ICF

- 445 14 Cunningham SA, Shaikh NI, Nhacolo A, *et al.* Health and Demographic Surveillance  
446 Systems Within the Child Health and Mortality Prevention Surveillance Network. *Clin Infect*  
447 *Dis* 2019;**69**:S274–9. doi:10.1093/cid/ciz609
- 448 15 icddr,b. Health and Demographic Surveillance System-Matlab, Volume 36, Registration of  
449 health and demographic events 2003. Dhaka, Bangladesh: : icddr,b 2006.
- 450 16 Rutstein S. The DHS Wealth Index: Approaches for Rural and Urban Areas. Calverton,  
451 Maryland, USA: : Macro International 2008.
- 452 17 Bomboka JB, N-Mboowa MG, Nakilembe J. Post - effects of obstetric fistula in Uganda; a  
453 case study of fistula survivors in KITOVU mission hospital (MASAKA), Uganda. *BMC*  
454 *Public Health* 2019;**19**:696. doi:10.1186/s12889-019-7023-7
- 455 18 Wall LL, Arrowsmith SD, Briggs ND, *et al.* The Obstetric Vesicovaginal Fistula in the  
456 Developing World. *Obstet Gynecol Surv* 2005;**60**.
- 457 19 Miller S, Lester F, Webster M, *et al.* Obstetric Fistula: A Preventable Tragedy. *J Midwifery*  
458 *Womens Health* 2005;**50**:286–94. doi:10.1016/j.jmwh.2005.03.009
- 459 20 Sikder SS, Labrique AB, Shamim AA, *et al.* Risk factors for reported obstetric complications  
460 and near misses in rural northwest Bangladesh: analysis from a prospective cohort study.  
461 *BMC Pregnancy Childbirth* 2014;**14**:347. doi:10.1186/1471-2393-14-347
- 462 21 Kamal SMM. What Is the Association Between Maternal Age and Neonatal Mortality? An  
463 Analysis of the 2007 Bangladesh Demographic and Health Survey. *Asia Pac J Public Health*  
464 2015;**27**:NP1106–17. doi:10.1177/1010539511428949

- 465 22 Hasan MM, Uddin J, Pulok MH, *et al.* Socioeconomic Inequalities in Child Malnutrition in  
466 Bangladesh: Do They Differ by Region? *Int J Environ Res Public Health* 2020;**17**.  
467 doi:10.3390/ijerph17031079
- 468 23 Abdullah K, Malek MA, Faruque ASG, *et al.* Health and nutritional status of children of  
469 adolescent mothers: experience from a diarrhoeal disease hospital in Bangladesh. *Acta*  
470 *Paediatr* 2007;**96**:396–400. doi:<https://doi.org/10.1111/j.1651-2227.2007.00117.x>
- 471 24 Killewo J, Anwar I, Bashir I, *et al.* Perceived Delay in Healthcare-seeking for Episodes of  
472 Serious Illness and Its Implications for Safe Motherhood Interventions in Rural Bangladesh.  
473 *J Health Popul Nutr* 2006;**24**:403–12.
- 474 25 Ahmed NU, Alam MM, Sultana F, *et al.* Reaching the Unreachable: Barriers of the Poorest  
475 to Accessing NGO Healthcare Services in Bangladesh. *J Health Popul Nutr* 2006;**24**:456–  
476 66.
- 477 26 Raj A, Saggurti N, Balaiah D, *et al.* Prevalence of child marriage and its effect on fertility  
478 and fertility-control outcomes of young women in India: a cross-sectional, observational  
479 study. *The Lancet* 2009;**373**:1883–9. doi:10.1016/S0140-6736(09)60246-4
- 480 27 Kamal SMM. Decline in Child Marriage and Changes in Its Effect on Reproductive  
481 Outcomes in Bangladesh. *J Health Popul Nutr* 2012;**30**:317–30.
- 482 28 Raj A, Saggurti N, Winter M, *et al.* The effect of maternal child marriage on morbidity and  
483 mortality of children under 5 in India: cross sectional study of a nationally representative  
484 sample. *BMJ* 2010;**340**. doi:10.1136/bmj.b4258

- 485 29 Streatfield PK, Kamal N, Ahsan KZ, *et al.* Early marriage in Bangladesh: Not as early as it  
486 appears. *Asian Popul Stud* 2015;**11**:94–110. doi:10.1080/17441730.2015.1012785
- 487 30 Amin S, Huq L. Marriage considerations in sending girls to school in Bangladesh: Some  
488 qualitative evidence. New York: : Population Council 2008.
- 489 31 Kamal SMM, Hassan CH. Child Marriage and Its Association With Adverse Reproductive  
490 Outcomes for Women in Bangladesh. *Asia Pac J Public Health* 2015;**27**:NP1492–506.  
491 doi:10.1177/1010539513503868
- 492 32 Chawanpaiboon S, Vogel JP, Moller A-B, *et al.* Global, regional, and national estimates of  
493 levels of preterm birth in 2014: a systematic review and modelling analysis. *Lancet Glob*  
494 *Health* 2019;**7**:e37–46. doi:10.1016/S2214-109X(18)30451-0
- 495 33 Neuman M, Alcock G, Azad K, *et al.* Prevalence and determinants of caesarean section in  
496 private and public health facilities in underserved South Asian communities: cross-sectional  
497 analysis of data from Bangladesh, India and Nepal. *BMJ Open* 2014;**4**:e005982.  
498 doi:10.1136/bmjopen-2014-005982
- 499 34 Kamal SMM. Preference for Institutional Delivery and Caesarean Sections in Bangladesh. *J*  
500 *Health Popul Nutr* 2013;**31**:96–109.
- 501 35 Government of the People’s Republic of Bangladesh. The Child Marriage Restraint Act,  
502 1929. 1929.<http://bdlaws.minlaw.gov.bd/act-details-149.html> (accessed 17 Mar 2021).

- 503 36 Human Rights Watch. Bangladesh: Legalizing Child Marriage Threatens Girls' Safety. Hum.  
504 Rights Watch. 2017.[https://www.hrw.org/news/2017/03/02/bangladesh-legalizing-child-](https://www.hrw.org/news/2017/03/02/bangladesh-legalizing-child-marriage-threatens-girls-safety)  
505 [marriage-threatens-girls-safety](https://www.hrw.org/news/2017/03/02/bangladesh-legalizing-child-marriage-threatens-girls-safety) (accessed 19 Jan 2021).
- 506 37 Finlay JE, Özaltın E, Canning D. The association of maternal age with infant mortality, child  
507 anthropometric failure, diarrhoea and anaemia for first births: evidence from 55 low- and  
508 middle-income countries. *BMJ Open* 2011;**1**:e000226. doi:10.1136/bmjopen-2011-000226
- 509 38 Samandari G, Sarker BK, Grant C, *et al.* Understanding individual, family and community  
510 perspectives on delaying early birth among adolescent girls: findings from a formative  
511 evaluation in rural Bangladesh. *BMC Womens Health* 2020;**20**:169. doi:10.1186/s12905-  
512 020-01044-z
- 513 39 Sethuraman K, Gujjarappa L, Kapadia-Kundu N, *et al.* Delaying the First Pregnancy: A  
514 Survey in Maharashtra, Rajasthan and Bangladesh. *Econ Polit Wkly* 2007;**42**:79–89.
- 515 40 Yount KM, Crandall A, Cheong YF, *et al.* Child Marriage and Intimate Partner Violence in  
516 Rural Bangladesh: A Longitudinal Multilevel Analysis. *Demography* 2016;**53**:1821–52.  
517 doi:10.1007/s13524-016-0520-8
- 518 41 Chowdhury FD. The socio-cultural context of child marriage in a Bangladeshi village. *Int J*  
519 *Soc Welf* 2004;**13**:244–53. doi:10.1111/j.1369-6866.2004.00318.x
- 520 42 Schuler SR, Bates LM, Islam F, *et al.* The timing of marriage and childbearing among rural  
521 families in Bangladesh: Choosing between competing risks. *Soc Sci Med* 2006;**62**:2826–37.  
522 doi:10.1016/j.socscimed.2005.11.004

- 523 43 UNICEF. Plan of Action launched to eliminate child marriage in Bangladesh. UNICEF.  
524 2018.<https://www.unicef.org/bangladesh/en/press-releases/plan-action-launched-eliminate->  
525 [child-marriage-bangladesh](https://www.unicef.org/bangladesh/en/press-releases/plan-action-launched-eliminate-child-marriage-bangladesh) (accessed 20 Jan 2021).
- 526 44 UNFPA, UNICEF. UNFPA-UNICEF Global Programme to End Child Marriage Phase I  
527 Report (2016-2019). UNFPA and UNICEF 2020.  
528 <https://www.unicef.org/media/83516/file/Child-marriage-annual-report-2019.pdf> (accessed  
529 12 Jan 2021).
- 530 45 Amin S, Saha JS, Ahmed JA. Skills-Building Programs to Reduce Child Marriage in  
531 Bangladesh: A Randomized Controlled Trial. *J Adolesc Health* 2018;**63**:293–300.  
532 doi:10.1016/j.jadohealth.2018.05.013
- 533
